1     **The social evolution of siderophore production in *Pseudomonas aeruginosa* is**  
2                                    **environmentally determined**

3  
4                    *Running title: Environment and fitness of siderophore mutants*

5  
6                                    Freya Harrison<sup>1,2</sup>

7                                    Alan McNally<sup>3</sup>

8                                    Ana C. da Silva<sup>2</sup>

9                                    Stephen P. Diggle<sup>2</sup>

10  
11     <sup>1</sup> School of Life Sciences, Gibbet Hill Campus, University of Warwick, Coventry CV4 7AL, U.K.

12         <sup>2</sup> Centre for Biomolecular Sciences, School of Life Sciences, University Park, University of  
13                                    Nottingham, Nottingham NG7 2RD, U. K.

14     <sup>3</sup> Institute of Microbiology and Infection, College of Medical and Dental Sciences, University of  
15                                    Birmingham, Edgbaston, Birmingham B15 2TT, U.K.

16  
17                                    *Authors for correspondence*

18                                    FH: f.harrison@warwick.ac.uk Tel. +44 (0)24 765 24744

19                                    SPD: steve.diggle@nottingham.ac.uk Tel.+44 (0)115 748 4267

20  
21  
22                                    *Funding*

23     This work was supported by the Universities of Nottingham and Warwick (FH), a Human Frontier  
24     Science Program Young Investigators grant to SPD (RGY0081/2012) and a NERC grant to SPD  
25                                    (NE/J007064/1).

26  
27                                    *Conflict of interest statement*

28     The authors declare that there are no competing financial interests in relation to the work described.  
29  
30  
31  
32

## 33 **Abstract**

34 Bacteria secrete various exoproducts whose benefits can be shared by all cells in the vicinity. The potential  
35 importance of these “public goods” in bacterial evolutionary ecology has been extensively studied. Cheating  
36 by siderophore-null mutants of the opportunistic pathogen *Pseudomonas aeruginosa* has received particular  
37 attention. The potential of siderophore mutants to attenuate virulence, and the possibility of exploiting this for  
38 clinical ends, have generated a wealth of publications. However, the possibility that genotype · environment  
39 interactions govern the evolutionary consequences of siderophore loss has been almost entirely ignored. A  
40 review of the available literature revealed (i) widespread use of an undefined mutant as a siderophore cheat;  
41 and (ii) a reliance on experiments conducted in iron-limited minimal medium. Whole genome sequencing of  
42 the undefined mutant revealed a range of mutations affecting phenotypes other than siderophore production.  
43 We then conducted cheating assays using defined deletion mutants, grown in conditions designed to model  
44 infected fluids and tissue in CF lung infection and non-healing wounds. Depending on the environment, we  
45 found that siderophore loss could lead to cheating, simple fitness defects, or no fitness effect at all. It is  
46 therefore crucial to develop appropriate *in vitro* growth conditions in order to better predict the social evolution  
47 of traits *in vivo*.

48

## 49 **Introduction**

50

51 Bacteria are social organisms, displaying coordinated behaviours including quorum sensing (QS), biofilm  
52 formation, and the production of shareable exoproducts (West et al 2007). Exoproducts which act as “public  
53 goods” (including iron-scavenging siderophores, exoproteases, biofilm polymers, toxins and QS signals) are  
54 vulnerable to “cheating”: cells which do not produce a particular molecule avoid the costs of production but  
55 reap the benefits of their neighbours’ investment and increase their evolutionary fitness at the expense of  
56 producers (Darch et al 2012, Diggle et al 2007, Griffin et al 2004, Harrison et al 2006, Jiricny et al 2010, Mund  
57 et al in prep, Raymond et al 2012). The circumstances under which cooperation can be maintained in the  
58 population over evolutionary time, versus those under which cheating prevails, have been predicted by theory  
59 (Frank 1998, Hamilton 1964). Because bacteria are amenable to evolution experiments, they have been widely  
60 used to test theoretical predictions (e.g. Diggle et al 2007, Griffin et al 2004, Kümmerli et al 2009a).  
61 Siderophore production by the opportunistic pathogen *Pseudomonas aeruginosa* is a particularly tractable  
62 workhorse for sociomicrobiology, facilitating tests of key evolutionary hypotheses (Table 1).

63

64 Early research into bacterial public goods focussed on using them as models to test general theory. But as the  
65 field progressed, researchers began to suggest that public goods play important roles in infected hosts. This  
66 led to suggestions that cooperation among pathogens could be manipulated for clinical ends, especially in hard-  
67 to-treat chronic infections (e.g. Harrison et al 2006, Rumbaugh et al 2009, Brown et al 2009, Foster 2005). *P.*  
68 *aeruginosa* causes various chronic infections in immunocompromised hosts, notably lung infections in people  
69 with cystic fibrosis (CF) and wound infections in people with burns or diabetic ulcers (Friedrich et al 2015,  
70 Hirsch and Tam 2010). Siderophore-null mutants can invade *in vitro* populations and cheat their way to high  
71 density, resulting in population reduction. Researchers have hypothesised that the presence of siderophore  
72 mutants in chronic infection isolates can be explained by cheating *in vivo*, and that siderophore mutants could  
73 be used as “Trojan horses” to ferry antibiotic-susceptibility alleles into infections and thus render them curable  
74 (Brown et al 2009, Harrison et al 2006).

75

76 One potential problem with this reasoning is the implicit assumption that gene expression and the fitness  
77 consequences of mutations are comparable *in vitro* and *in vivo*. Technical advances have revealed just how  
78 much bacterial transcriptomes (Croucher and Thomson 2010) and the fitness of loss-of-function mutants (Van  
79 Opijnen et al 2009) vary across environments; indeed, environment may be a bigger predictor of *P. aeruginosa*  
80 phenotype than its genetic background (Dötsch et al 2015). When the environment bacteria experience in a  
81 specific infection context is carefully modelled in the lab, the importance of genotype × environment  
82 interactions in determining fitness become very clear (Harrison et al 2014, Palmer et al 2007, Turner et al  
83 2015).

84

85 Typically, siderophore experiments are conducted in iron-limited minimal medium, creating clear costs and  
86 benefits to siderophore production. While this may recapitulate the iron restriction encountered by pathogens  
87 colonising healthy hosts during acute infection, chronic infections present an entirely different environment.  
88 Tissue damage, a hyper-inflammatory response and disease-specific changes in host phenotype (e.g. increased  
89 mucus volume and adhesivity in CF lungs, (Boucher 2007) are accompanied changes in the growth substrates  
90 available to bacteria. In CF lungs, bacteria use amino acids released by damaged tissues, or from mucus, as  
91 carbon sources (Flynn et al 2016, Palmer et al 2005, Palmer et al 2007), and iron is plentiful (Tyrrell and  
92 Callaghan 2016). Consequently, bacterial gene expression – and presumably the roles played by virulence  
93 factors – differ in chronic and acute contexts (Goodman et al 2004). Because lab models of the environments  
94 encountered in CF lungs and soft-tissue wounds have been developed (Harrison et al 2014, Harrison and  
95 Diggle in press, Palmer et al 2007, Turner et al 2015, Werthén et al 2010), there is a pressing need to re-assess  
96 the role played by siderophore mutants in environments that better model chronic infection.

97  
98 To assess and extend the potential of laboratory experiments to yield clinically useful data on the evolutionary  
99 dynamics of siderophore production, we defined three aims. First, we reviewed published experimental work  
100 on *P. aeruginosa* siderophore cooperation. This literature has not previously been systematically reviewed.  
101 Our goal was to characterise any biases in the literature which could restrict its applicability to the various  
102 environments in which this flexible opportunist can thrive. We found two such biases and defined two further  
103 empirical aims to address these.

104  
105 The first potential bias in the literature was that many experiments (by ourselves and others) used an  
106 uncharacterised, UV-generated mutant (PAO9) as a siderophore cheat. We therefore conducted whole-genome  
107 sequencing of this mutant to determine (i) the genetic basis of its siderophore-null phenotype, and (ii) whether  
108 it carries other mutations that could affect the outcome of competition with the wild type. The second source  
109 of bias was the lack of studies employing a well-defined model of chronic infection. We therefore determined  
110 the fitness consequences of siderophore loss-of-function mutations in relatively well-characterised models of  
111 CF lung infection and chronic soft-tissue wounds. Because we found many mutations that potentially affect  
112 metabolism and growth in PAO9, we used siderophore deletion mutant of the siderophores pyoverdine and  
113 pyochelin for these experiments. CF lung infection was modelled using (a) liquid artificial sputum medium  
114 (ASM: Palmer et al 2007, Turner et al 2015); and (b) an *ex vivo* model of biofilm infection in which small  
115 sections of porcine bronchiole are infected with bacteria and cultured in ASM (Harrison and Diggle in press).  
116 Chronic wound infection was modelled using (a) synthetic wound fluid (SWF), and (b) synthetic wound fluid  
117 solidified with collagen to form model soft-tissue plugs (Werthén et al 2010). We explicitly explored  
118 differences between liquid medium and structured infection models because spatial structure affects the social  
119 dynamics of public goods (Frank 1998, Kümmerli et al 2009c, Mund et al in prep), and because biofilm  
120 formation in structured models could alter gene expression and the fitness consequences of mutation

121 (Bjarnsholt et al 2013, Whiteley et al 2001). Our results demonstrate that whether siderophore mutants act as  
122 cheats is dependent on the environment, and suggest that these mutants may not act as cheats *in vivo*.

123

124

## 125 **Meaterials & Methods**

126

### 127 *Bacterial strains*

128 *P. aeruginosa* ATCC 15692 (PAO1) was used as a wild type siderophore producer and clean  $\Delta$ *pvdD* and  
129  $\Delta$ *pvdD* $\Delta$ *pchEF* mutants in this background (Ghysels et al 2004) used as single pyoverdine and double  
130 pyoverdine/pyochelin mutants, respectively. The UV-induced mutant PA6609 (PAO9) was derived from  
131 PAO6049 (Hohnadel et al 1986); PAO6049 is a Tn5-induced methionine auxotroph derived from PAO1 (Rella  
132 et al 1985).

133

### 134 *Collating and analysing experimental work on siderophore cheating*

135 To identify published experiments on siderophore cheating, we used Scopus.com to (i) conduct a literature  
136 search and (ii) locate articles citing already-identified experimental and theoretical articles on siderophore  
137 social evolution. For each experiment in each article, we recorded which strains/clones and media were used;  
138 whether an explicit test for cooperation was conducted (relative fitness of mutant in pure/mixed culture with a  
139 producer strain & growth or final density of pure/mixed cultures); the starting frequency of mutants in co-  
140 culture experiments; the location of key data in the article; whether cheating was observed and any other key  
141 conclusions. The diverse starting frequencies and mutants used make this data unsuitable for formal meta-  
142 analysis, so we simply present the key characteristics and findings of the studies in a format that facilitates  
143 qualitative comparison.

144

### 145 *Whole genome sequencing of PAO6609 (PAO9)*

146 PAO9 was cultured overnight in 10 ml Lysogeny Broth at 37°C on an orbital shaker. Genomic DNA was  
147 extracted using a Sigma Aldrich GenElute Bacterial Genomic DNA Kit. Library preparation was performed  
148 using the Nextera XT library preparation kit (Illumina), and 2 x 300 bp paired-end sequencing performed on  
149 the Illumina MiSeq platform using a V3 sequencing cartridge, to approximately 50x coverage. Reads were  
150 assembled using SPAdes run with the `-careful` flag, and annotated using Prokka. This produced an assembly  
151 of 6,232,039 bp comprising 89 contigs with an N50 of 220,789. The assembly was compared with the reference  
152 PAO1 genome (NCBI reference sequence NC\_002516) using BLAST and the comparison visualised using  
153 ACT to search for gene acquisition or loss events. SNP typing was performed by mapping the raw reads of  
154 PAO9 against the PAO1 reference genome (NC\_002516.2) using SMALT and Samtools. A total of 98.3% of  
155 1.17M reads mapped to the reference, from which high fidelity SNPs were called using a cut off of minimum  
156 allele frequency of 0.8, minimum quality score 30, and minimum depth of 8.

157

158 *Growth conditions for cheating experiments*

159 We used five different growth environments. In each case, cultures were grown in 24-well microtitre plates  
160 and incubated on a rocking platform at 37°C. (i) 2 ml casamino acids medium (CAA: 5 g casamino acids,  
161 1.18 g  $K_2HPO_4 \cdot 3H_2O$ , 0.25 g  $MgSO_4 \cdot 7H_2O$ , per litre) supplemented with 20 mM  $NaHCO_3$  and  
162  $100 \mu g mL^{-1}$  human apo-transferrin (Sigma), cultured for 24 hours. (ii) 2 ml artificial sputum medium (ASM)  
163 following recipe in Palmer et al (2007), cultured for 24 or 48 hours. (iii) 5 mm<sup>2</sup> pig bronchiole + 400  $\mu l$  ASM  
164 following protocol in Harrison and Diggle (in press), cultured for 96 hours. (iv) 2 ml synthetic wound fluid  
165 (50% v/v peptone water / fetal bovine serum following Werthén et al (2010)), cultured for 24 or 48 hours. (v)  
166 400  $\mu l$  synthetic chronic wound (SCW: SWF solidified with rat tail collagen following protocol in Werthén et  
167 al, (2010)), cultured for 48 hours. For environments ii-v, we measured wild-type siderophore production and  
168 calculated the fitness of siderophore mutants relative to the wild type in clonal and mixed culture. Four or five  
169 replica cultures were inoculated with (a) wild-type, (b)  $\Delta pvdD$  (c)  $\Delta pvdD\Delta pchEF$ , (d) 50% wild-type + 50%  
170  $\Delta pvdD$  or (e) 50% wild-type + 50%  $\Delta pvdD\Delta pchEF$  bacteria for each environment/culture time combination,  
171 and each experiments was repeated twice to yield two experimental blocks. For environment i (CAA), we  
172 simply measured siderophore production by four replica populations of the wild type for comparison with  
173 environments ii-v.

174 The density of the inoculum was kept as consistent as possible across environments and population  
175 types, as cell density can affect the outcome of wild-type – siderophore-null co-culture experiments (Ross-  
176 Gillespie et al 2009). For experiments in CAA, ASM and SWF, each culture was inoculated with a total of two  
177 colonies of the relevant genotype(s), picked from LB plates using a 200  $\mu l$  pipette tip. For experiments in *ex*  
178 *vivo* bronchiole and SCW, each culture was inoculated with two colonies of the relevant genotype(s), picked  
179 from LB plates using an insulin syringe fitted with a 30 G needle.

180 To construct time courses of bacterial growth in ASM, two colonies of (a) wild-type, (b)  $\Delta pvdD$  or  
181 (c)  $\Delta pvdD\Delta pchEF$  were inoculated into four 2 ml aliquots of ASM in a 24-well microtitre plate. This was  
182 incubated at 37°C in a Tecan Infinite 200 Pro multimode reader for 18 hours; every 20 minutes, the plate was  
183 shaken for two seconds and absorbance of each well read at 400 nm. (Reading at more traditional values of  
184 600-700 nm risks interference from absorbance by pyoverdine in wild-type cultures).

185  
186 *Statistical analyses*

187 Data were analysed in R 3.3.0 (Team 2016) using general linear models and ANOVA. To meet model  
188 assumptions of homoscedasticity and normality of residuals, fitness data from SWF were log-transformed and  
189 fitness data from ASM and *ex vivo* bronchiole square-root transformed; fitness data from SCWs did not require  
190 transformation. Where missing values caused non-orthogonality, the *car* package (Fox and Weisberg 2011)  
191 was used to perform ANOVA with Type II sums of squares, returning correct F-ratios for main effects in  
192 models containing an interaction. Fitted means and confidence intervals were retrieved, and post-hoc contrasts  
193 tested, using the *lsmeans* package (Lenth 2013). Post-hoc multiple comparisons against a control were  
194 implemented using Dunnett's test in the *multcomp* package (Hothorn et al 2008).

195

196 *Data availability*

197 Raw sequence data has been deposited in the European Nucleotide Archive (Accession number:  
198 ERR1725797). Summary information on mutations in PAO9 (Fig 1) and raw data for experiments depicted in  
199 Figures 2-5 and S2 are available as Supplementary Information at the *Nature Ecology & Evolution* website.

200

201 **Results**

202

203 **Defining key research priorities: analysis of published experiments.**

204 A review of published experiments on *P. aeruginosa* siderophore mutants and cheating identified 33  
205 experiments in 18 published articles, summarised in Table 1. Two-thirds of the experiments used the well-  
206 characterised lab strain PAO1 as the siderophore-producing wild-type, and 5 experiments used clinical or  
207 environmental isolates. Of the 28 experiments that did not focus on natural isolates, 14 used defined  
208 siderophore mutants. These included deletions of the *pvdD/pvdF* and/or *pchEF* loci, which are involved in the  
209 biosynthesis of the siderophores pyoverdine and the pyochelin, respectively. Of the remainder, 9 used the UV-  
210 induced mutant PAO9 and 5 used spontaneous or evolved mutants.

211

212 31/33 experiments in Table 1 were conducted in CAA minimal medium, in all but one case made further iron-  
213 limited by the addition of the human iron chelator transferrin. This medium was not designed to reflect any  
214 specific natural environment: it was optimised to ensure that siderophores were necessary for growth, and  
215 acted as a public good, when bacteria were cultured in it (Griffin et al 2004). This makes it ideal for  
216 experiments to test evolutionary theory about why and how different social strategies can be selected for.  
217 Experiments in iron-limited CAA have, for instance, revealed that the potential for siderophore mutants to  
218 cheat can be curtailed by the scale of competition in a metapopulation (Griffin et al 2004) or by growth in a  
219 structured environment, where spatial segregation prevents mutants from accessing siderophores produced by  
220 wild types (Kümmerli et al, 2009c). As an opportunist with a large, flexible metabolome and secretome, *P.*  
221 *aeruginosa* can persist in a range of environments. Some of these may be approximated by iron-limited  
222 minimal media. For instance, experiments conducted in CAA may therefore be useful for understanding the  
223 dynamics of siderophore genotypes/phenotypes at the onset of acute infection in healthy host tissues, where  
224 iron is sequestered by high-affinity host chelators (including transferrin), or in nutrient-poor abiotic  
225 environments.

226

227 One study explicitly tested the effect of environmental variables on siderophore production in monoculture.  
228 Dumas et al (2013) dissected the relative roles of pyoverdine and pyochelin, suggesting that while pyoverdine  
229 is the primary siderophore expressed under severe iron limitation, under moderate iron limitation pyochelin  
230 production dominates. The authors used parameters estimated from these experiments to simulate wild-type –  
231 siderophore mutant competition in a range of environmental scenarios, and found that the fitness consequences

232 of siderophore-null mutations varied. Based on these results, the authors suggested that pyoverdine-deficient  
233 mutants may be favoured in chronic infection due to better growth in high-iron, low-pH environments, rather  
234 than because they are cheats. The importance of environmental iron regime and pyoverdine/pyochelin  
235 switching in determining the fitness consequences of siderophore mutants has also been explored in a suite of  
236 experiments using the closely-related bacterium *P. fluorescens*: pyoverdine mutants of this species were shown  
237 to cheat under severe, but not moderate, iron limitation (Zhang and Rainey 2013, Kümmerli and Ross-Gillespie  
238 2013).

239

240 Further, the strength of siderophore cheating may be constrained. Cheating could become self-limiting as  
241 increases in mutant frequency alter the cost:benefit ratio of losing siderophore production, or the cost:benefit  
242 ratio may be different in actively-growing versus established populations. In many studies that explored a  
243 range of starting frequencies, mutants acts cheats only when they are initially inoculated at frequencies  $\leq 0.1$ ,  
244 which raises questions about the ability of these mutants to retain cheat at, and persist at, higher frequencies.  
245 In some cases, even though co-culture increased mutant relative fitness to  $> 1$ , there was no detrimental effect  
246 on total population density. These observations call into question the ability of siderophore mutants to act as  
247 “Trojan horses” to treat infection, as does the observation in one study (Ghoul et al 2016) that a siderophore  
248 mutant only cheats if added to wild-type cultures before stationary phase.

249

250 Therefore, whether siderophore-null mutants act as cheats in chronic infection remains an open question. It is  
251 possible that increased availability of iron in chronically-damaged tissues means that the benefits of  
252 siderophore production are reduced and that production is downregulated, removing any advantage to  
253 siderophore-null genotypes. Alternatively, siderophores may be beneficial but not exploitable by potential  
254 cheats: this could result from spatial structuring, persistence in stationary phase, and/or a reliance on  
255 siderophore recycling rather than continued production (Kümmerli & Brown 2010).

256

### 257 **Whole genome sequence of a commonly-used siderophore cheat, PAO9**

258 The nature of the mutation leading to the siderophore-negative phenotype in PAO9 is not known. Further, as  
259 UV mutagenesis is non-specific, it is likely that this strain carries additional mutations that influence other  
260 important aspects of its phenotype, or moderate the fitness consequences siderophore loss. Without knowing  
261 the exact genotype of PAO9, we cannot be sure that empirical results obtained using it are the result of its  
262 siderophore phenotype alone. We performed whole genome sequencing of this strain and mapped the raw  
263 sequence data against a PAO1 reference genome (NCBI Reference Sequence: NC\_002516.2, Stover et al  
264 2000). The results are summarised in Figure 1. PAO9 harbours a single  $\sim 6.6$ kb deletion, removing most of the  
265 non-ribosomal peptide synthetase locus *pvdJ*, which is involved in synthesising the pyoverdine side chain.  
266 This deletion also removes part of the open reading frame immediately upstream of *pvdJ*, PA2402. PA2402  
267 encodes a probable non-ribosomal peptide synthetase of unknown function. We also found 90 high-resolution  
268 SNPs. The details of the deletion and SNPS are provided as Supplementary Information. Briefly, none of the



269 SNPs were in loci associated with pyoverdine or pyochelin biosynthesis. However, we found SNPs resulting  
 270 in mis-sense mutations in *cyoE*, which is involved in iron metabolism, in four loci associated with nitrogen  
 271 metabolism (*napA*, *napF*, *cysG*, PA1779), two loci involved in quorum sensing (*lasI*, *qteE*), two loci involved  
 272 in motility (*fliO*, *fimV*) and the *cpo* gene, which is involved in the biosynthesis of many organochlorine  
 273 compounds: all of these mutations could potentially affect growth and/or virulence. Finally, we found a mis-  
 274 sense mutation in the *rho* transcription termination factor. Further work would be needed to deduce the effects  
 275 of this mutation, but the possibility of generalised defects in the control of gene expression cannot be ruled  
 276 out. In summary, PAO9 harbours numerous mutations in addition to the *pvdJ* partial deletion that likely make  
 277 it an unreliable strain to use for empirical studies of the fitness and virulence consequences of siderophore loss.  
 278  
 279  
 280

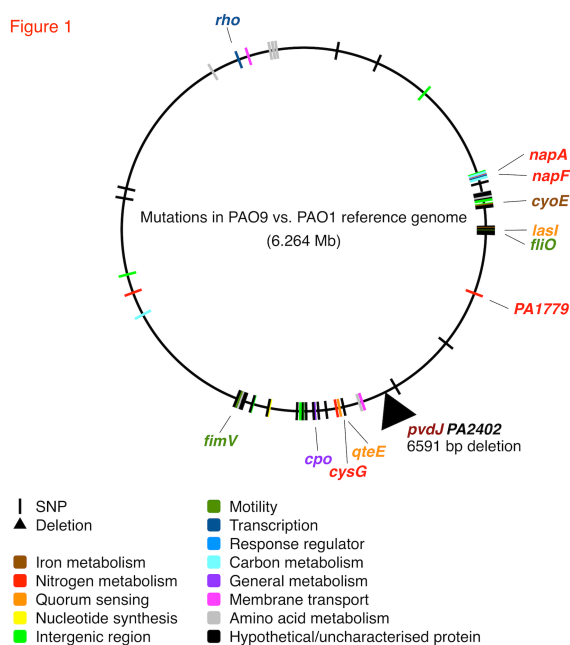

281  
 282  
 283 **Figure 1.** Location of one deletion and 90 SNPs in the genome of PAO6609 (PAO9), mapped against a PAO1  
 284 reference sequence (NC\_002516.2). SNPs are colour coded by functional class of the locus affected. 11 SNPs  
 285 that that result in amino acid substitution and which seem most likely to affect growth and virulence are  
 286 highlighted and the gene name given.

287  
 288  
 289 **Production of siderophores by *P. aeruginosa* in models of chronic lung and wound infections.**

290 Because of the problems identified with PAO9, we used defined siderophore mutants to test the potential for  
 291 social cheating in laboratory conditions that have been developed to represent specific chronic infection  
 292 contexts, with strict attention to maximising likely ecological validity. As discussed above, while most research  
 293 has focused on pyoverdine, under less severe iron limitation the metabolically cheaper siderophore pyochelin

294 may take on a primary role in iron chelation (Dumas et al 2013, Kümmerli and Ross-Gillespie 2013). We  
295 therefore used a standard wild-type lab strain (PAO1) and two isogenic deletion mutants: a single pyoverdine  
296 knock-out ( $\Delta pvdD$ ) and a double pyoverdine/pyochelin knockout ( $\Delta pvdD\Delta pchEF$ ) constructed using allelic  
297 exchange (Ghysels et al 2004). Both mutants have been reported to act as social cheats in iron-limited CAA,  
298 when inoculated in co-culture with the wild type at starting frequencies of up to 50% (Table 1, (Kümmerli et  
299 al 2009b, 2015; Kümmerli and Brown 2010).

300  
301 We first verified that PAO1 produces siderophores in our chronic infection models, and compared production  
302 levels with those in iron-limited CAA. Detectable levels of pyoverdine and pyochelin were produced in all  
303 environments. Per-cell levels of pyoverdine and pyochelin were (i) positively correlated and (ii) higher in lung  
304 and wound infection models than in liquid ASM or SWF (despite lower cells densities in infection models than  
305 in corresponding liquid medium) (Figure S1). Consistent with the suggestion of Dumas et al (2013), the  
306 pyochelin:pyoverdine ratio was generally higher in chronic infection models and media than in CAA. Replica  
307 cultures in *ex vivo* lung and synthetic wounds were more variable than replica cultures in liquid media.

308  
309 **Social dynamics of siderophore mutants in artificial CF sputum are influenced by genotype and culture**  
310 **time.**

311 Mutant and wild-type bacteria were grown in pure culture and each mutant was grown in mixed culture with  
312 the wild type, with a starting frequency of 50%, in ASM. After 24 and 48 hours of growth, total population  
313 densities were determined and the relative fitness of each mutant in pure and mixed culture calculated. As  
314 shown Figure 2a, neither mutant had a relative fitness significantly different from 1 when grown in pure  
315 culture.  $\Delta pvdD$  mutant fitness was unaffected by the wild type, but the  $\Delta pvdD\Delta pchEF$  mutant was  
316 outcompeted in mixed culture. These results are not consistent with either mutant acting as a cheat: they do  
317 not show a disadvantage when cultured alone, and do not benefit from growth with the wild type.

318  
319 After 48 hours (Figure 2b), the results were different. The  $\Delta pvdD$  mutant now showed cheating dynamics: it  
320 was less fit than the wild type when grown in pure culture but as fit as the wild type in mixed culture. As  
321 predicted for a textbook “cheat,” the presence of the  $\Delta pvdD$  mutant reduced total population density: mixed  
322 cultures reached similar densities to pure  $\Delta pvdD$  cultures (Figure 2c). The  $\Delta pvdD\Delta pchEF$  mutant was simply  
323 less fit than the wild type regardless of culture condition.

324  
325 Time course experiments (Figure S2) suggested that the  $\Delta pvdD$  mutant is disadvantaged in pure culture in  
326 ASM because it ceases logarithmic growth earlier than the wild type, reaching a lower yield in stationary  
327 phase. The  $\Delta pvdD\Delta pchEF$  mutant has the double disadvantage of a longer lag phase and an earlier cessation  
328 of logarithmic growth. This is consistent with the differing fitness of the mutants at 24 vs. 48 hours: continued  
329 growth and siderophore production by the wild type from 24-48 h presumably provide an opportunity for the  
330  $\Delta pvdD$  mutant to cheat.

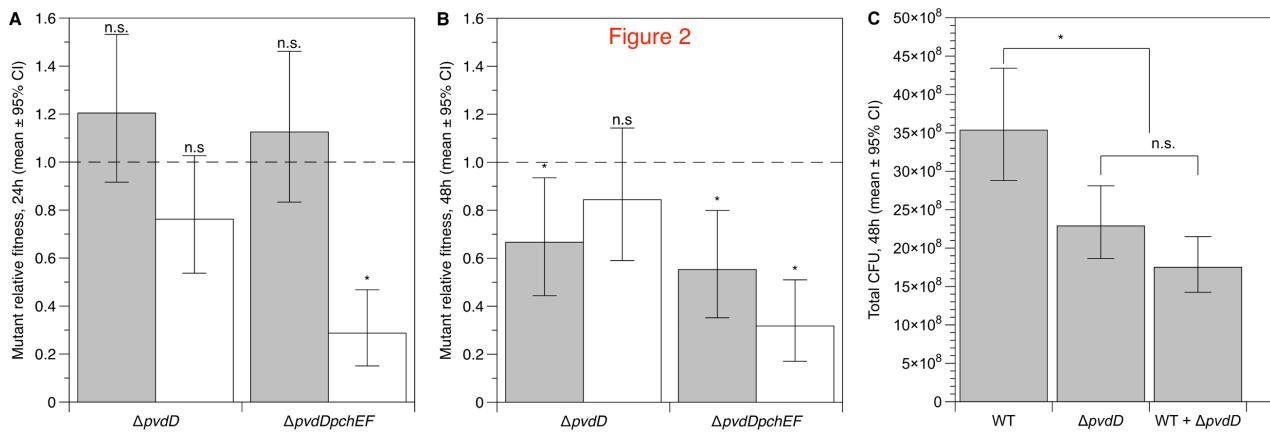

331

332

333

334

335

336

337

338

339

**Figure 2.** (a,b) Relative fitness of  $\Delta pvdD$  and  $\Delta pvdD\Delta pchEF$  mutants in pure culture (grey bars) and in mixed culture with an isogenic wild type (white bars) in ASM after (a) 24 and (b) 48 hours of growth. (c) Cheating by  $\Delta pvdD$  over 48 hours of co-culture results in mixed wild type + mutant cultures showing the same reduction in total population density as pure mutant cultures. Bars show means of 9-10 replicates split across two replica experiments, with associated 95% confidence interval. After ANOVA, post-hoc tests were conducted to determine whether each fitted mean value was significantly different from 1: \* =  $p < 0.02$ ; n.s. = not significant.

339

**Siderophore mutants are outcompeted by the wild type in model of CF bronchiolar biofilm.**

340

341

342

343

344

345

346

347

ASM models the chemistry of CF mucus (Palmer et al 2007, Turner et al 2015), but liquid culture lacks realistic spatial structure. To allow bacteria to form biofilm associated with bronchiolar surfaces (Bjarnsholt et al 2013), we repeated the monoculture and 50% co-culture experiments in an *ex vivo* model comprising a section of pig bronchiole cultured in ASM for four days. *P. aeruginosa* forms a loose sleeve of mucoid biofilm around the tissue (Harrison and Diggle in press). The only significant predictor of relative fitness was presence/absence of the wild type: both strains had a relative fitness of 1 in pure culture but showed a trend towards being outcompeted in mixed culture (Figure 3). This trend was significant for the  $\Delta pvdD\Delta pchEF$  mutant.

347

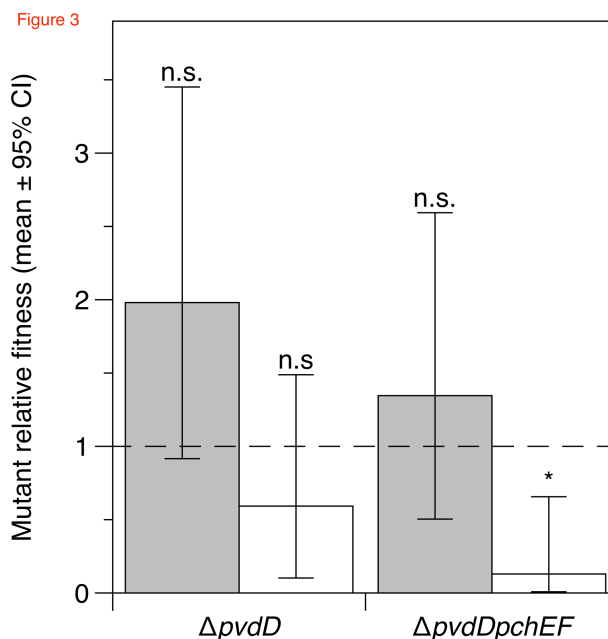

348

349 **Figure 3.** Relative fitness of  $\Delta pvdD$  and  $\Delta pvdD\Delta pchEF$  mutants in pure culture (grey bars) and in mixed  
350 culture with an isogenic wild type (white bars) in *ex vivo* pig lung + ASM after 96 hours of growth. Bars show  
351 means of 8 replicates spread across two replica experiments, with associated 95% confidence interval. After  
352 ANOVA, post-hoc *t*-tests were conducted to determine whether each fitted mean value was significantly  
353 different from 1: \* =  $p = 0.007$ ; n.s. = not significant.

354

355 **Siderophore mutants do not suffer a long-term fitness disadvantage in synthetic wound fluid.**

356 We next repeated the pure/mixed culture experiments in synthetic wound fluid (SWF: Werthén et al 2010).  
357 The only significant predictor of relative fitness at 24 hours was presence/absence of the wild type (Figure 4a).  
358 The  $\Delta pvdD$  mutant was as fit as the wild type in pure culture, and the  $\Delta pvdD\Delta pchEF$  mutant slightly and  
359 significantly fitter, but both mutants were outcompeted by the wild type in mixed culture. After 48 hours  
360 (Figure 4b), there was no difference between genotypes or culture conditions: both mutants had a relative  
361 fitness of 1 regardless of wild type presence.

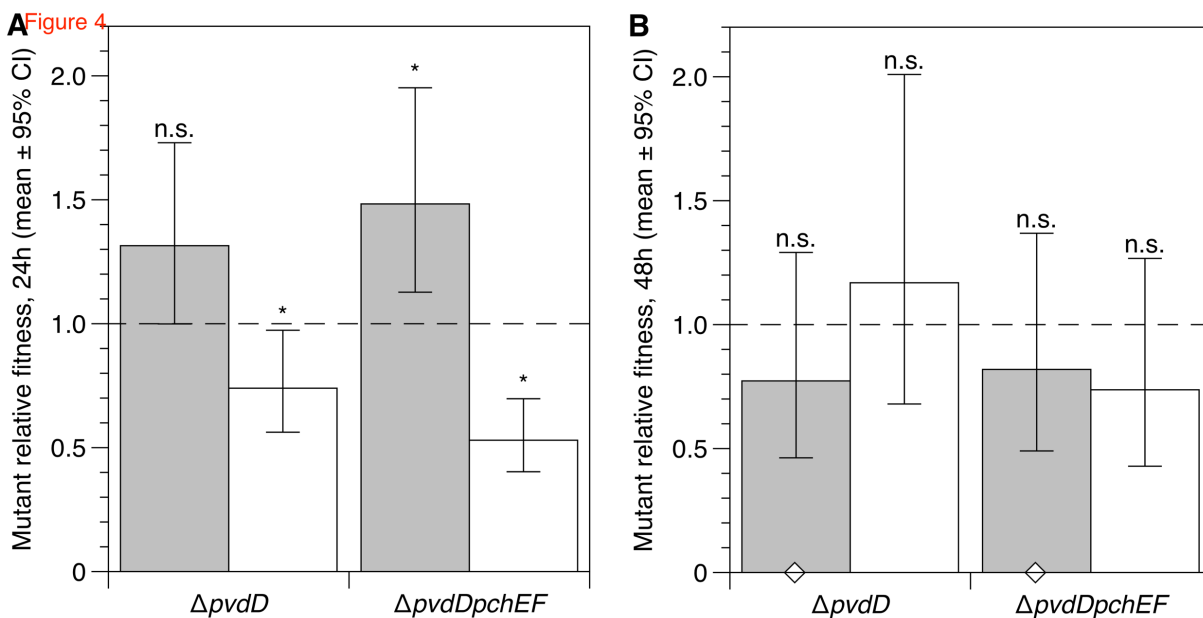

362

363 **Figure 4.** Relative fitness of  $\Delta pvdD$  and  $\Delta pvdD\Delta pchEF$  mutants in pure culture (grey bars) and in mixed  
364 culture with an isogenic wild type (white bars) in SWF after (a) 24 and (b) 48 hours of growth. Bars show  
365 means of 10 replicates split across two replica experiments, with associated 95% confidence interval. After  
366 ANOVA, post-hoc *t*-tests were conducted to determine whether each fitted mean value was significantly  
367 different from 1: \* =  $p < 0.02$ ; n.s. = not significant. Confidence intervals and *p*-values in (b) are taken from a  
368 model that excluded two outliers where relative fitness was zero (indicated by open diamonds): including these  
369 outliers in the analysis did not change any of the conclusions given in the text.

370

371 **Siderophore mutants do not have any fitness disadvantage in synthetic chronic wounds.**

372 As with the CF lung model, we wished to add spatial structure to SWF to better model a soft tissue infection.  
373 SWF was solidified with collagen (Werthén et al 2010) and experiments repeated in the resulting solid plugs.

374 After 48 hours in synthetic wounds, (Figure 5), both mutants had a relative fitness of 1 regardless of culture  
375 condition.

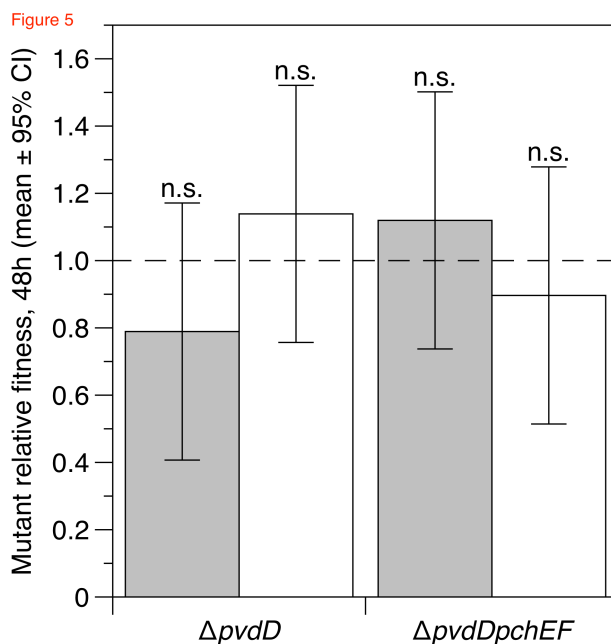

376  
377 **Figure 5.** Relative fitness of  $\Delta pvdD$  and  $\Delta pvdD\Delta pchEF$  mutants in pure culture (grey bars) and in mixed  
378 culture with an isogenic wild type (white bars) in synthetic wounds after 48 hours of growth. Bars show means  
379 of 10 replicates split across two replica experiments, with associated 95% confidence interval. After ANOVA,  
380 post-hoc *t*-tests were conducted to determine whether each fitted mean value was significantly different from  
381 1: n.s. = not significant.

382

## 383 Discussion

384

385 Many experiments have been conducted to explore the social evolution of siderophore production by *P.*  
386 *aeruginosa*. These have been used to suggest explanations for the appearance of siderophore mutants in chronic  
387 infections; and how this behaviour could be exploited for clinical ends. Our targeted literature review revealed  
388 potential restrictions on the generality of predictions made from these experiments about the dynamics of  
389 siderophore mutants in nature. First, many experiments used an undefined mutant as a siderophore cheat. We  
390 sequenced this strain and found that while it has a deletion of one of the pyoverdine biosynthetic loci, it also  
391 carries numerous mutations in genes likely to affect growth and metabolism in unpredictable ways. It is  
392 therefore difficult to disentangle the effects of siderophore phenotype vs. other phenotypes on its evolutionary  
393 dynamics. Second, most published experiments were carried out in iron-limited minimal broth. Inferences  
394 made from these experiments may provide information on the fitness consequences of siderophore loss in  
395 acute infections (Granato et al 2016). However, a growing body of evidence strongly suggests that these  
396 inferences may not be generalisable to chronic infection contexts, where bacteria experience quite different  
397 and idiosyncratic environments that likely affect the cost:benefit ratio of siderophore production, the ability of  
398 cells to access each other's siderophores and the growth rate of bacterial populations. Experiments that dissect

399 the fitness consequences of siderophore loss in environmentally-explicit models of infection could  
400 significantly increase our understanding of the natural history of siderophore production, and have enhanced  
401 clinical relevance.

402

403 We tested whether deletion mutants for pyoverdine or pyoverdine+pyochelin acted as cheats in four laboratory  
404 models designed to represent chronic infections: structured and unstructured models of CF lung infections and  
405 non-healing soft-tissue wounds. While these models are not perfect, they have been validated with  
406 microbiological and chemical data from real infections, and we present them as examples of improved lab  
407 models of specific infection contexts.

408

409 When increased levels of public goods production increase the population growth rate, or increase carrying  
410 capacity, cheating mutants are predicted to be under negative frequency-dependent selection (Ross-Gillespie  
411 et al 2007). It is therefore usual to conduct cheating assays using a range of starting frequencies, including  
412 <50%. We chose to initially conduct cheating assays using only a 50% starting frequency, as both of the  
413 mutants we used have been reported to act as cheats under this condition in iron-limited CAA (Kümmerli et al  
414 2009b, 2015; Kümmerli and Brown 2010). Further, if mutants that cheat from low starting frequencies cannot  
415 maintain this advantage as they become more common, then the likely clinical significance of cheating as a  
416 determinant of virulence – and the potential power of a “Trojan horse” approach to managing infection – is  
417 called into question. Further investigation of different starting frequencies was not necessary: in the case of  
418 ASM, the single mutant showed cheating dynamics even at this high starting frequency, and in all other media,  
419 both mutants had equal fitness to the wild type in pure culture so cannot be called cheats regardless of the  
420 outcome of competition at any starting frequency.

421

422 Wild-type *P. aeruginosa* produced siderophores in all of our test environments. However, there was  
423 environment-dependent variation in siderophore production, and the ratio of pyochelin:pyoverdine was higher  
424 in chronic infection models than in CAA (Figure S1). This is consistent with a suggestion by other authors that  
425 pyochelin production may be favoured in chronic infection, where iron is more freely available, or is bound to  
426 weaker host chelators than transferrin (Dumas et al 2013, Hunter et al 2013, McCallin et al 2015). The  
427 pyoverdine mutant was less fit than the wild type in monoculture in artificial CF sputum after 48 hours’ growth,  
428 demonstrating a benefit to pyoverdine production in this environment, and was able to cheat on the wild type.  
429 In all other environments tested, there was no effect of losing pyoverdine production on fitness. Production of  
430 pyoverdine in these environments may therefore be a maladaptive response, or may have benefits other than  
431 simple growth rate enhancement. There was a non-significant trend towards this mutant being outcompeted  
432 by the wild type in *ex vivo* bronchiolar biofilm. This may be due to poor biofilm production, even when iron  
433 is plentiful (Banin et al 2005, Harrison and Buckling 2009). The pyoverdine+pyochelin mutant was less fit  
434 than the wild type in artificial CF sputum and model bronchiolar biofilms, but had no disadvantage in synthetic  
435 wound fluid or synthetic wound biofilm.

436

437 These results underline the importance of genotype  $\times$  environment interactions in determining bacterial fitness,  
438 and hence the necessity of carefully-designed lab models for predicting the likely consequences of mutations  
439 in infection. We previously reported that *P. aeruginosa* QS mutants, which are cheats in an acute infection  
440 context (Rumbaugh et al 2009, Wilder et al 2011), are not cheats in an *ex vivo* model of chronic CF lung  
441 infection (Harrison et al 2014). Together with the present results, this demonstrates the unreliability of  
442 extrapolating predictions about bacterial social evolution from one infection context to another.

443

444 So why do siderophore-null mutants arise during chronic infection? Are they cheats, or simply better adapted  
445 to local growth conditions? Are they not selected at all, but present transiently and/or at low frequencies? We  
446 cannot answer these questions with current data. Careful choice and optimisation of *in vitro* models that allow  
447 for long-term evolution experiments in realistic environments will be invaluable in providing answers.  
448 Alongside such models there is also a need for (a) quantitative, rather than qualitative, data from patients on  
449 the prevalence of siderophore mutants and (b) more considered choice of “wild type” and mutant genotypes,  
450 paying particular attention to genotypes that commonly arise during chronic infection. The fitness  
451 consequences of siderophore loss could depend on the nature of the mutations involved, and on background  
452 genotype. In future, it would be useful to conduct experiments with a range of clinical isolates that are most  
453 typical of those seen in patients, and/or with constructed mutants that recapitulate these.

454

455 For instance, we and other authors have focussed on experiments with siderophore-null mutants that result  
456 from mutations in siderophore biosynthesis. However, a recent study of siderophore mutants isolated from CF  
457 patients found that the majority actually carried mutations in the regulatory gene *pvdS* (Andersen et al 2015).  
458 Sequencing clones from an *in vitro* evolution experiment also revealed pyoverdine-negative phenotypes that  
459 stemmed from *pvdS* mutation (Ross-Gillespie et al 2015, R Kümmerli, personal communication). *PvdS*  
460 encodes a sigma factor that positively regulates the expression of the pyoverdine biosynthetic loci and is itself  
461 up-regulated by iron starvation (Miyazaki et al 1995), but which also positively regulates the expression of  
462 other virulence-related exoproducts (Gaines et al 2007, Hunt et al 2002, Ochsner et al 1996, Wilson et al 2001).  
463 Longitudinal sampling from patients (Andersen et al 2015) showed that mutations in siderophore receptors  
464 only occur once siderophore-null mutants are present. This was interpreted by the authors as evidence for  
465 cheating driving the loss of siderophores. But in the absence of explicit tests for cheating by these isolates in  
466 co-culture with co-isolated wild types, in growth media that mimics lung biofilm, the longitudinal pattern  
467 presented does not unequivocally prove this conclusion. Other possible explanations include early selection  
468 on regulatory loci due to other downstream phenotypes and/or reduced transcriptional costs; a relaxation of  
469 purifying selection for functional siderophore receptors in the late stages of infection when iron is plentiful; a  
470 bias in the data set towards early isolates which increases the conditional probability that later isolates are also  
471 siderophore-null; or a combination of all of these factors.

472

473 Our results demonstrate the necessity of evaluating and modelling in-host environments as carefully as possible  
474 if we aim to understand in-host microbiology. Lab experiments in simple *in vitro* conditions have limited  
475 ecological and clinical validity and so limited predictive power. A plethora of data on the chemical and  
476 microbial ecology of chronic infection is now available, providing abundant material for researchers wishing  
477 to study the natural history pathogens in the lab (e.g. for CF: Cowley et al 2015, Flynn et al 2016, Folkesson  
478 et al 2012, Kyle et al 2015, Quinn et al 2014, Roberts et al 2015, Turner et al 2015, Yang et al 2011). This  
479 information is ripe for consideration by microbiologists who – quite justifiably – see great potential for  
480 manipulating the in-host ecology of pathogens in order to halt the progression of debilitating chronic infection.

481

482

### 483 **Acknowledgements**

484 This work was supported by the Universities of Nottingham and Warwick (FH), a Human Frontier Science  
485 Program Young Investigators grant to SPD (RGY0081/2012) and a NERC grant to SPD (NE/J007064/1). We  
486 thank Pierre Cornelis for the *P. aeruginosa* wild type and siderophore knockout strains, Angus Buckling for  
487 PAO9 and Rolf Kümmerli and Stuart West for helpful comments on the manuscript.

488

### 489 **Author contributions**

490 FH & SPD conceived the study and designed experiments. FH, AM and ACS carried out experimental work.  
491 FH & AM analysed data. FH drafted the manuscript. All authors contributed to manuscript development.

492

### 493 **Competing financial interests**

494 The authors declare that there are no competing financial interests in relation to the work described.

495

### 496 **Materials and correspondence**

497 Correspondence and requests for materials should be addressed to FH and SPD.

498

499

500



## 501 **References**

- 502 Andersen SB, Marvig RL, Molin S, Krogh Johansen H, Griffin AS (2015). Long-term social dynamics drive  
503 loss of function in pathogenic bacteria. *Proceedings of the National Academy of Sciences* **112**: 10756-10761.  
504
- 505 Banin E, Vasil ML, Greenberg EP (2005). Iron and *Pseudomonas aeruginosa* biofilm formation. *Proceedings*  
506 *of the National Academy of Sciences of the United States of America* **102**: 11076-11081.  
507
- 508 Bjarnsholt T, Alhede M, Alhede M, Eickhardt-Sørensen SR, Moser C, Kühl M *et al* (2013). The *in vivo* bio-  
509 film. *Trends in Microbiology* **21**: 466-474.  
510
- 511 Boucher RC (2007). Airway surface dehydration in cystic fibrosis: pathogenesis and therapy. *Annual Review*  
512 *of Medicine* **58**: 157-170.  
513
- 514 Brown SP, West SA, Diggle SP, Griffin AS (2009). Social evolution in micro-organisms and a Trojan horse  
515 approach to medical intervention strategies. *Philosophical Transactions of the Royal Society B: Biological*  
516 *Sciences* **364**: 3157-3168.  
517
- 518 Cowley ES, Kopf SH, LaRiviere A, Ziebis W, Newman DK (2015). Pediatric cystic fibrosis sputum can be  
519 chemically dynamic, anoxic, and extremely reduced due to hydrogen sulfide formation. *mBio* **6** e00767-15.  
520
- 521 Croucher NJ, Thomson NR (2010). Studying bacterial transcriptomes using RNA-seq. *Current Opinion in*  
522 *Microbiology* **13**: 619-624.  
523
- 524 Darch SE, West SA, Winzer K, Diggle SP (2012). Density-dependent fitness benefits in quorum-sensing bac-  
525 terial populations. *Proceedings of the National Academy of Sciences of the United States of America* **109**:  
526 8259-8263.  
527
- 528 Diggle SP, Griffin AS, Campbell GS, West SA (2007). Cooperation and conflict in quorum-sensing bacterial  
529 populations. *Nature* **450**: 411-414.  
530
- 531 Dötsch A, Schniederjans M, Khaledi A, Hornischer K, Schulz S, Bielecka A *et al* (2015). The *Pseudomonas*  
532 *aeruginosa* transcriptional landscape is shaped by environmental heterogeneity and genetic variation. *mBio* **6**:  
533 e00749-00715.  
534
- 535 Dumas Z, Kümmerli R (2012). Cost of cooperation rules selection for cheats in bacterial metapopulations.  
536 *Journal of Evolutionary Biology* **25**: 473-484.  
537
- 538 Dumas Z, Ross-Gillespie A, Kümmerli R (2013). Switching between apparently redundant iron-uptake mech-  
539 anisms benefits bacteria in changeable environments. *Proceedings of the Royal Society B: Biological Sciences*  
540 **280**.  
541
- 542 Flynn JM, Niccum D, Dunitz JM, Hunter RC (2016). Evidence and role for bacterial mucin degradation in  
543 cystic fibrosis airway disease. *PLoS Pathogens* **12**: e1005846.  
544
- 545 Folkesson A, Jelsbak L, Yang L, Johansen HK, Ciofu O, Hoiby N *et al* (2012). Adaptation of *Pseudomonas*  
546 *aeruginosa* to the cystic fibrosis airway: An evolutionary perspective. *Nature Reviews Microbiology* **10**: 841-  
547 851.  
548
- 549 Foster KR (2005). Hamiltonian medicine: Why the social lives of pathogens matter. *Science* **308**: 1269-1270.  
550
- 551 Fox J, Weisberg S (2011). *An R Companion to Applied Regression*. SAGE Publications.  
552
- 553 Frank SA (1998). *Foundations of Social Evolution*. Princeton University Press. Princeton, NJ.  
554

- 555 Friedrich M, Lessnau K-D, Cunha BA (2015). *Pseudomonas aeruginosa* Infections. *Medscape Drugs & Dis-*  
556 *eases*. <http://emedicine.medscape.com/article/226748>.  
557
- 558 Gaines JM, Carty NL, Tiburzi F, Davinic M, Visca P, Colmer-Hamood JA *et al* (2007). Regulation of the  
559 *Pseudomonas aeruginosa* *toxA*, *regA* and *ptxR* genes by the iron-starvation sigma factor PvdS under reduced  
560 levels of oxygen. *Microbiology* **153**: 4219-4233.  
561
- 562 Ghoul M, West SA, Diggle SP, Griffin AS (2014). An experimental test of whether cheating is context de-  
563 pendent. *Journal of Evolutionary Biology* **27**: 551-556.  
564
- 565 Ghoul M, West SA, McCorkell FA, Lee Z-B, Bruce JB, Griffin AS (2016). Pyoverdine cheats fail to invade  
566 bacterial populations in stationary phase. *Journal of Evolutionary Biology* **29**: 1728–1736.  
567
- 568 Ghysels B, Dieu BTM, Beatson SA, Pirnay JP, Ochsner UA, Vasil ML *et al* (2004). FpvB, an alternative type  
569 I ferrityoverdine receptor of *Pseudomonas aeruginosa*. *Microbiology* **150**: 1671-1680.  
570
- 571 Goodman AL, Kulasekara B, Rietsch A, Boyd D, Smith RS, Lory S (2004). A signaling network reciprocally  
572 regulates genes associated with acute infection and chronic persistence in *Pseudomonas aeruginosa*. *Develop-*  
573 *mental Cell* **7**: 745-754.  
574
- 575 Granato ET, Harrison F, Kümmerli R, Ross-Gillespie A (2016). When is a bacterial "virulence factor" really  
576 virulent? *bioRxiv*. doi: 10.1101/061317  
577
- 578 Griffin AS, West SA, Buckling A (2004). Cooperation and competition in pathogenic bacteria. *Nature* **430**:  
579 1024-1027.  
580
- 581 Hamilton WD (1964). The genetical evolution of social behaviour I & II. *Journal of Theoretical Biology* **7**: 1-  
582 52.  
583
- 584 Harrison F, Browning LE, Vos M, Buckling A (2006). Cooperation and virulence in acute *Pseudomonas ae-*  
585 *eruginosa* infections. *BMC Biology* **4**: 21.  
586
- 587 Harrison F, Paul J, Massey RC, Buckling A (2008). Interspecific competition and siderophore-mediated co-  
588 operation in *Pseudomonas aeruginosa*. *ISME Journal* **2**: 49-55.  
589
- 590 Harrison F, Buckling A (2009). Siderophore production and biofilm formation as linked social traits. *ISME*  
591 *Journal* **3**: 632-634.  
592
- 593 Harrison F, Buckling A (2011). Wider access to genotypic space facilitates loss of cooperation in a bacterial  
594 mutator. *PLoS ONE* **6**: e17254.  
595
- 596 Harrison F, Muruli A, Higgins S, Diggle SP (2014). Development of an *ex vivo* porcine lung model for study-  
597 ing growth Virulence, And signaling of *Pseudomonas aeruginosa*. *Infection and Immunity* **82**: 3312-3323.  
598
- 599 Harrison F, Diggle S (in press). An *ex vivo* lung model to study bronchioles infected with *Pseudomonas aeru-*  
600 *ginosa* biofilms. *Microbiology*. doi: 10.1099/mic.0.000352.  
601
- 602 Hirsch EB, Tam VH (2010). Impact of multidrug-resistant *Pseudomonas aeruginosa* infection on patient out-  
603 comes. *Expert review of pharmacoeconomics & outcomes research* **10**: 441-451.  
604
- 605 Hohnadel D, Haas D, Meyer JM (1986). Mapping of mutations affecting pyoverdine production in *Pseudomo-*  
606 *nas aeruginosa*. *FEMS Microbiology Letters* **36**: 195-199.  
607
- 608 Hothorn T, Bretz F, Westfall P (2008). Simultaneous inference in general parametric models. *Biometrical*  
609 *Journal* **50**: 346-363.  
610

- 611 Hunt TA, Peng W-T, Loubens I, Storey DG (2002). The *Pseudomonas aeruginosa* alternative sigma factor  
612 PvdS controls exotoxin A expression and is expressed in lung infections associated with cystic fibrosis. *Mi-*  
613 *crobiology* **148**: 3183-3193.
- 614  
615 Hunter RC, Asfour F, Dingemans J, Osuna BL, Samad T, Malfroot A, Cornelis P, Newman, DK (2013). Fer-  
616 rous iron is a significant component of bioavailable iron in cystic fibrosis airways. *mBio* **4**: e00557-13.
- 617  
618 Jiricny N, Diggle SP, West SA, Evans BA, Ballantyne G, Ross-Gillespie A *et al* (2010). Fitness correlates  
619 with the extent of cheating in a bacterium. *Journal of Evolutionary Biology* **23**: 738-747.
- 620  
621 Kümmerli R, Gardner A, West SA, Griffin AS (2009a). Limited dispersal, budding dispersal, and cooperation:  
622 an experimental study. *Evolution* **63**: 939-949.
- 623  
624 Kümmerli R, Jiricny N, Clarke LS, West SA, Griffin AS (2009b). Phenotypic plasticity of a cooperative be-  
625 haviour in bacteria. *Journal of Evolutionary Biology* **22**: 589-598.
- 626  
627 Kümmerli R, Griffin AS, West SA, Buckling A, Harrison F (2009c). Viscous medium promotes cooperation  
628 in the pathogenic bacterium *Pseudomonas aeruginosa*. *Proceedings of the Royal Society B: Biological Sci-*  
629 *ences* **276**: 3531-3538.
- 630  
631 Kümmerli R, Brown SP (2010). Molecular and regulatory properties of a public good shape the evolution of  
632 cooperation. *Proceedings of the National Academy of Sciences of the United States of America* **107**: 18921-  
633 18926.
- 634  
635 Kümmerli R, Van Den Berg P, Griffin AS, West SA, Gardner A (2010). Repression of competition favours  
636 cooperation: experimental evidence from bacteria. *Journal of Evolutionary Biology* **23**: 699-706.
- 637  
638 Kümmerli R, Ross-Gillespie A (2014). Explaining the sociobiology of pyoverdinin producing *Pseudomonas*: a  
639 comment on Zhang and Rainey (2013). *Evolution* **68**: 3337-3343.
- 640  
641 Kümmerli R, Santorelli LA, Granato ET, Dumas Z, Dobay A, Griffin AS *et al* (2015). Co-evolutionary dy-  
642 namics between public good producers and cheats in the bacterium *Pseudomonas aeruginosa*. *Journal of Evo-*  
643 *lutionary Biology* **28**: 2264-2274.
- 644  
645 McCallin K, Cowley E, Reyes MC, Van Sambeek L, Hunter R, Asfour F *et al* (2015). Sputum iron levels  
646 during cystic fibrosis pulmonary exacerbation: a longitudinal study. *American Thoracic Society International*  
647 *Conference Abstracts B52: Pediatric Cystic Fibrosis* pp A3343-A3343.
- 648  
649 Lenth RV (2013). lsmmeans: R Package Version 1.06-05.
- 650  
651 Miyazaki H, Kato H, Nakazawa T, Tsuda M (1995). A positive regulatory gene, *pvdS*, for expression of pyo-  
652 verdin biosynthetic genes in *Pseudomonas aeruginosa* PAO. *Molecular and General Genetics MGG* **248**: 17-  
653 24.
- 654  
655 Mund A, Diggle SP, Harrison F (2016). The fitness of *Pseudomonas aeruginosa* quorum sensing signal cheats  
656 is influenced by the diffusivity of the environment. *bioRxiv*. doi: 10.1101/082230
- 657  
658 Ochsner UA, Johnson Z, Lamont IL, Cunliffe HE, Vasil ML (1996). Exotoxin A production in *Pseudomonas*  
659 *aeruginosa* requires the iron-regulated *pvdS* gene encoding an alternative sigma factor. *Molecular Microbiol-*  
660 *ogy* **21**: 1019-1028.
- 661  
662 Palmer KL, Mashburn LM, Singh PK, Whiteley M (2005). Cystic fibrosis sputum supports growth and cues  
663 key aspects of *Pseudomonas aeruginosa* physiology. *Journal of Bacteriology* **187**: 5267-5277.
- 664  
665 Palmer KL, Aye LM, Whiteley M (2007). Nutritional cues control *Pseudomonas aeruginosa* multicellular  
666 behavior in cystic fibrosis sputum. *Journal of Bacteriology* **189**: 8079-8087.

- 667  
668 Quinn RA, Lim YW, Maughan H, Conrad D, Rohwer F, Whiteson KL (2014). Biogeochemical forces shape  
669 the composition and physiology of polymicrobial communities in the cystic fibrosis lung. *mBio* **5**: e00956-13.  
670
- 671 Raymond B, West SA, Griffin AS, Bonsall MB (2012). The dynamics of cooperative bacterial virulence in the  
672 field. *Science* **336**: 85-88.  
673
- 674 Rella M, Mercenier A, Haas D (1985). Transposon insertion mutagenesis of *Pseudomonas aeruginosa* with a  
675 Tn5 derivative: application to physical mapping of the *arc* gene cluster. *Gene* **33**: 293-303.  
676
- 677 Roberts AEL, Kragh KN, Bjarnsholt T, Diggle SP (2015). The limitations of *in vitro* experimentation in un-  
678 derstanding biofilms and chronic infection. *Journal of Molecular Biology* **427**: 3646–3661.  
679
- 680 Ross-Gillespie A, Gardner A, West SA, Griffin AS (2007). Frequency dependence and cooperation: Theory  
681 and a test with bacteria. *American Naturalist* **170**: 331-342.  
682
- 683 Ross-Gillespie A, Gardner A, Buckling A, West SA, Griffin AS (2009). Density dependence and cooperation:  
684 theory and a test with bacteria. *Evolution* **63**: 2315-2325.  
685
- 686 Ross-Gillespie A, Dumas Z, Kümmerli R (2015). Evolutionary dynamics of interlinked public goods traits: an  
687 experimental study of siderophore production in *Pseudomonas aeruginosa*. *Journal of Evolutionary Biology*  
688 **28**: 29-39.  
689
- 690 Rumbaugh KP, Diggle SP, Watters CM, Ross-Gillespie A, Griffin AS, West SA (2009). Quorum sensing and  
691 the social evolution of bacterial virulence. *Current Biology* **19**: 341-345.  
692
- 693 Stover CK, Pham XQ, Erwin AL, Mizoguchi SD, Warrener P, Hickey MJ *et al* (2000). Complete genome  
694 sequence of *Pseudomonas aeruginosa* PAO1, an opportunistic pathogen. *Nature* **406**: 959-964.  
695
- 696 Team RDC (2016). R: A Language and Environment for Statistical Computing. R Foundation for Statistical  
697 Computing, Vienna, Austria. <http://www.R-project.org>.  
698
- 699 Turner KH, Wessel AK, Palmer GC, Murray JL, Whiteley M (2015). Essential genome of *Pseudomonas ae-*  
700 *ruginosa* in cystic fibrosis sputum. *Proc Natl Acad Sci U S A* **112**: 4110–4115.  
701
- 702 Tyrrell J, Callaghan M (2016). Iron acquisition in the cystic fibrosis lung and potential for novel therapeutic  
703 strategies. *Microbiology* **162**: 191-205.  
704
- 705 Van Opijnen T, Bodi KL, Camilli A (2009). Tn-seq: high-throughput parallel sequencing for fitness and ge-  
706 netic interaction studies in microorganisms. *Nat Methods* **6**.  
707
- 708 Werthén M, Henriksson L, Jensen PØ, Sternberg C, Givskov M, Bjarnsholt T (2010). An *in vitro* model of  
709 bacterial infections in wounds and other soft tissues. *APMIS* **118**: 156-164.  
710
- 711 West SA, Diggle SP, Buckling A, Gardner A, Griffin AS (2007). The social lives of microbes. *Annual Review*  
712 *of Ecology, Evolution, and Systematics*. pp 53-77.  
713
- 714 Whiteley M, Bangera MG, Bumgarner RE, Parsek MR, Teitzel GM, Lory S *et al* (2001). Gene expression in  
715 *Pseudomonas aeruginosa* biofilms. *Nature* **413**: 860-864.  
716
- 717 Wilder CN, Diggle SP, Schuster M (2011). Cooperation and cheating in *Pseudomonas aeruginosa*: the roles  
718 of the *las*, *rhl* and *pqs* quorum-sensing systems. *ISME Journal* **5**: 1332-1343.  
719
- 720 Wilson MJ, McMorran BJ, Lamont IL (2001). Analysis of promoters recognized by PvdS, an extracytoplas-  
721 mic-function sigma factor protein from *Pseudomonas aeruginosa*. *Journal of Bacteriology* **183**: 2151-2155.  
722

- 723 Yang L, Jelsbak L, Marvig RL, Damkiær S, Workman CT, Rau MH *et al* (2011). Evolutionary dynamics of  
724 bacteria in a human host environment. *Proceedings of the National Academy of Sciences of the United States*  
725 *of America* **108**: 7481-7486.  
726
- 727 Zhang X-X, Rainey PB (2013). Explaining the sociobiology of pyoverdinin producing *Pseudomonas*. *Evolution*  
728 **67**: 3161-3174.  
729  
730  
731

732 **Supplementary Information**

733

734 **SuppInfo\_1.xls.** Information on the SNPs and deletion found in the genome of PAO6609 (PAO9) (Figure 1).

735 **Will be supplied on acceptance or during review process**

736

737 **SuppInfo\_2.xls.** Raw data for Figures 2-5, S1-2. **Will be supplied on acceptance or during review process**

738

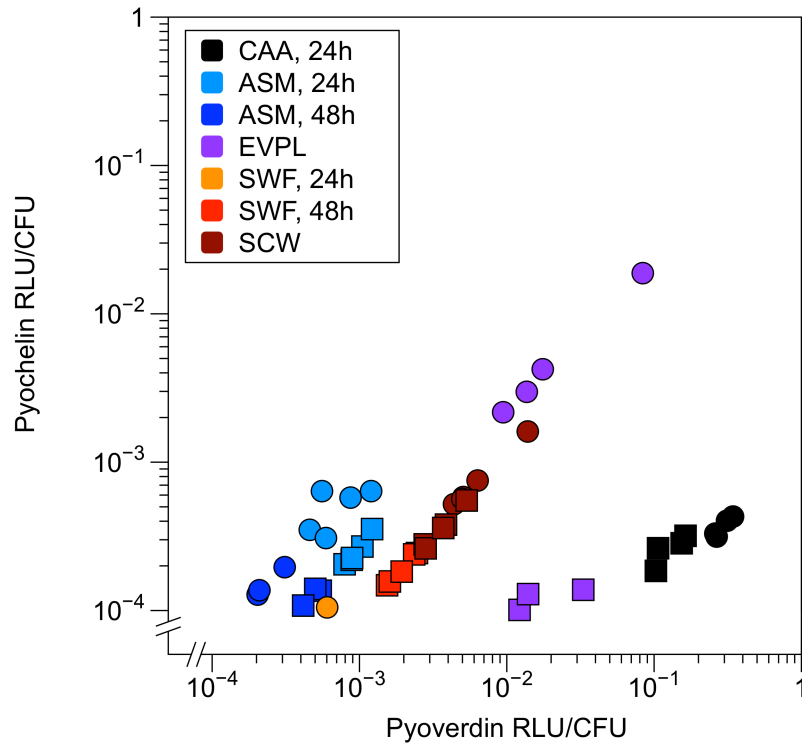

739

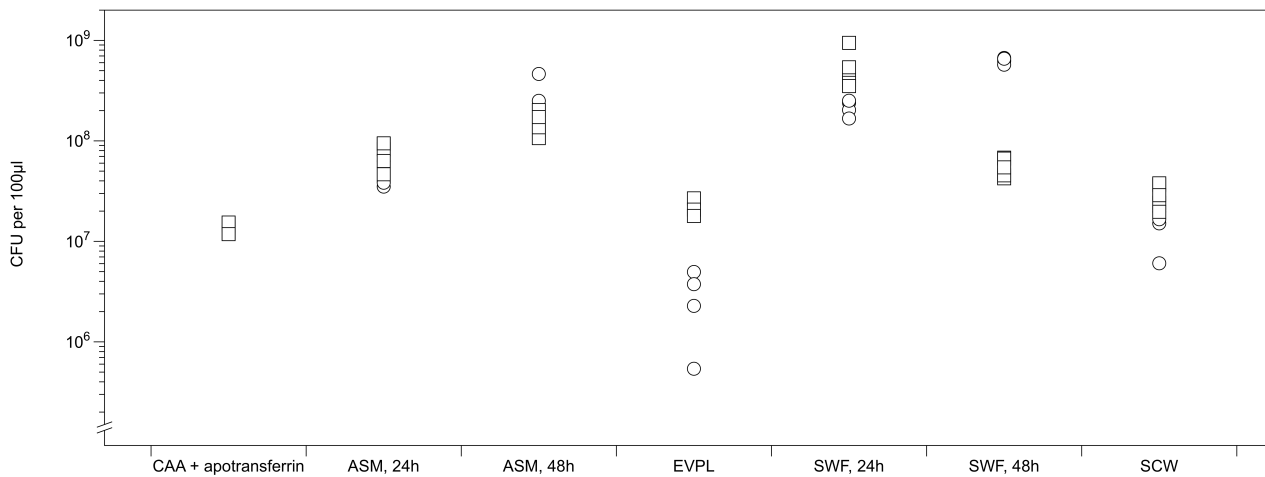

740

741 **Figure S1.** (a) Levels of pyoverdin and pyochelin produced by wild-type *P. aeruginosa* in the different  
742 environments explored in this study. Molecules were detected by excitation-emission assays of 100 µl aliquots  
743 of culture supernatant and expressed as relative luminescence units (RLU) divided by the number of *P.*  
744 *aeruginosa* colony-forming units (CFU) present in 100 µl of the original culture. Symbols denote experimental  
745 block. (b) Bacterial density (CFU per 100 µl) the different environments. Symbols denote experimental block.

746 CAA: casamino acids medium, ASM: artificial sputum medium, EVPL: *ex vivo* pig lung model, SWF:  
747 synthetic wound fluid, SCW: synthetic chronic wound model.  
748

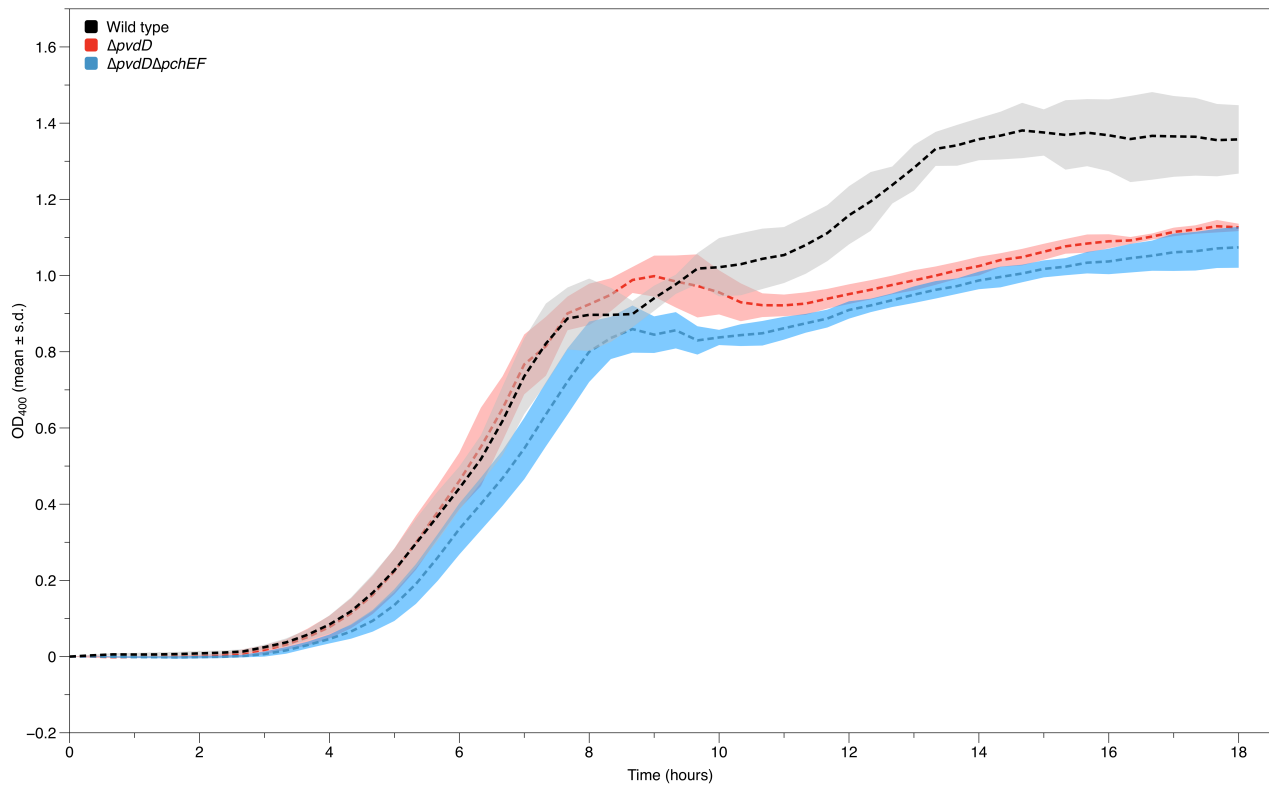

749  
750 **Figure S2.** Growth of wild type (black),  $\Delta pvdD$  (red) and  $\Delta pvdD\Delta pchEF$  (blue) *P. aeruginosa* in 200  $\mu$ l ASM  
751 over 18 hours. Optical density was read at 400 nm to minimise interference from pyoverdine absorbance in  
752 wild-type cultures. Lines show means of four replica cultures, shaded areas show  $\pm$  one standard deviation.

**Table 1.** Results of a review of the empirical literature on *P. aeruginosa* siderophore mutants and cheating.

| Reference                         | Producer strain       | Non-producer strain                                                         | Growth medium                                | Specific test for cooperation              | Location of results in publication | Non-producer start frequency | Cheating observed? | Notes                                                                                                                                                                           |
|-----------------------------------|-----------------------|-----------------------------------------------------------------------------|----------------------------------------------|--------------------------------------------|------------------------------------|------------------------------|--------------------|---------------------------------------------------------------------------------------------------------------------------------------------------------------------------------|
| <b>Griffin et al 2004</b>         | ATCC 15692 (PAO1)     | PA06609 (PAO9)                                                              | CAA + apotransferrin                         | Yes                                        | Text                               | 0.5                          | Variable           | Cheating was concluded on the basis of differences in density of pure vs. mixed culture, relative fitness not reported.                                                         |
| <b>Harrison et al 2006</b>        | ATCC 15692 (PAO1)     | PA06609 (PAO9)                                                              | Waxworm                                      | Yes                                        | Figs 3, 4                          | 0.03-0.9                     | No                 | Highest reported cheat relative fitness is 1, at start frequencies $\leq 0.01$                                                                                                  |
| <b>Ross-Gillespie et al 2007</b>  | ATCC 15692 (PAO1)     | PA06609 (PAO9)                                                              | CAA + apotransferrin                         | Yes                                        | Fig 3                              | 0.001-0.99                   | Variable           | Cheating observed at starting frequencies $\leq 0.1$ ; total population density only affected at lowest start frequency                                                         |
| <i>Ross-Gillespie et al 2007</i>  | ATCC 15692 (PAO1)     | PAO1 $\Delta pvdD$                                                          | CAA + apotransferrin                         | Yes                                        | Fig 3                              | 0.001-0.99                   | Variable           | Cheating observed at starting frequencies of 0.001, but no effect on total population density. This mutant gains less fitness benefit from coculture than PAO9 does             |
| <i>Ross-Gillespie et al 2007</i>  | UCBPP-PA14 (clinical) | Spontaneous mutant                                                          | CAA + apotransferrin                         | Yes                                        | Fig 3                              | 0.001-0.99                   | Variable           | Cheating observed at start frequencies $\leq 0.1$ , but no effects on total population density. This mutant gains less fitness benefit from coculture than PAO9 does            |
| <b>Harrison et al 2008</b>        | PAO985                | Evolved clones                                                              | CAA + apotransferrin / iron, $\pm S. aureus$ | No                                         | Figs 1,2                           | 0                            |                    |                                                                                                                                                                                 |
| <b>Kümmerli et al 2009a</b>       | ATCC 15692 (PAO1)     | PA06609 (PAO9)                                                              | CAA + apotransferrin                         | Yes                                        | Text                               | 0.33                         | Yes                |                                                                                                                                                                                 |
| <b>Kümmerli et al 2009b</b>       | ATCC 15692 (PAO1)     | PAO1 $\Delta pvdD$                                                          | CAA + apotransferrin                         | No                                         |                                    |                              |                    |                                                                                                                                                                                 |
| <i>Kümmerli et al 2009b</i>       | ATCC 15692 (PAO1)     | PAO1 $\Delta pvdD/\Delta pchEF$                                             | CAA + apotransferrin                         | Yes                                        | Fig 4                              | 0.17-0.83                    | Yes                | Cheat is always fitter than the wild type, even when competed at a starting frequency of 0.83.                                                                                  |
| <b>Kümmerli et al 2009c</b>       | ATCC 15692 (PAO1)     | PA06609 (PAO9)                                                              | CAA + apotransferrin                         | Yes                                        | Fig 2                              | 0.33                         | Variable           | Cheating is time dependent                                                                                                                                                      |
| <b>Harrison and Buckling 2009</b> | ATCC 15692 (PAO1)     | <i>pvdF</i> transposon mutant in MPAO1 background (PA2396-C04::IS-lacZ/hah) | CAA + apotransferrin                         | No, but raw data available for re-analysis | Raw data                           | 0.5                          | No                 | Re-analysis of raw data reveals this mutant is less fit than the wild type in mixtures with a starting frequency of 0.5 in planktonic and bio-film culture.                     |
| <i>Harrison and Buckling 2009</i> | ATCC 15692 (PAO1)     | Clones evolved from PAO6049                                                 | CAA + apotransferrin                         | No                                         | Raw data                           | 0.5                          | No                 | Mutants outcompete the wild type in planktonic mixed culture, but so does their siderophore-producing ancestor & they are lab adapted, growing as well as PAO1 in pure culture. |
| <b>Ross-Gillespie et al 2009</b>  | ATCC 15692 (PAO1)     | PA06609 (PAO9)                                                              | CAA + apotransferrin                         | Yes                                        | Fig 2                              | 0.09                         | No                 |                                                                                                                                                                                 |



|                                   |                               |                                                   |                      |     |           |                                       |          |                                                                                                                                                                                                                                                |
|-----------------------------------|-------------------------------|---------------------------------------------------|----------------------|-----|-----------|---------------------------------------|----------|------------------------------------------------------------------------------------------------------------------------------------------------------------------------------------------------------------------------------------------------|
| Ross-Gillespie et al 2009         | ATCC 15692 (PAO1)             | PAO1 $\Delta pvdD$                                | CAA + apotransferrin | Yes | Fig 2     | 0.09                                  | Variable | Cheating observed at high cell density only.                                                                                                                                                                                                   |
| Ross-Gillespie et al 2009         | UCBPP-PA14 (clinical isolate) | Spontaneous mutant                                | CAA + apotransferrin | Yes | Fig 2     | 0.09                                  | Variable | Cheating observed at high cell density only.                                                                                                                                                                                                   |
| <b>Kümmerli et al 2010</b>        | ATCC 15692 (PAO1)             | PA06609 (PAO9)                                    | CAA + apotransferrin | Yes | Text      | 0.5                                   | Yes      |                                                                                                                                                                                                                                                |
| <b>Kümmerli and Brown 2010</b>    | ATCC 15692 (PAO1)             | PAO1 $\Delta pvdD$                                | CAA + apotransferrin | Yes | Fig 5     | 0.5                                   | Yes      |                                                                                                                                                                                                                                                |
| <i>Kümmerli and Brown 2010</i>    | PAO6049                       | PA06609 (PAO9)                                    | CAA + apotransferrin | No  |           |                                       |          |                                                                                                                                                                                                                                                |
| <i>Kümmerli and Brown 2010</i>    | Environmental isolate         | Spontaneous mutant                                | CAA + apotransferrin | Yes | Fig 5     | 0.5                                   | Yes      |                                                                                                                                                                                                                                                |
| <b>Jiricny et al 2010</b>         | ATCC 15692 (PAO1)             | PAO1 $\Delta pvdD$                                | CAA + apotransferrin | Yes | Figs 4,5  | 0.09                                  | Yes      |                                                                                                                                                                                                                                                |
| <i>Jiricny et al 2010</i>         | ATCC 15692 (PAO1)             | PAO1 $\Delta pchEF$                               | CAA + apotransferrin | No  |           | 0.09                                  |          |                                                                                                                                                                                                                                                |
| <i>Jiricny et al 2010</i>         | ATCC 15692 (PAO1)             | PAO1 $\Delta pvdD/\Delta pchEF$                   | CAA + apotransferrin | No  |           | 0.09                                  |          |                                                                                                                                                                                                                                                |
| <i>Jiricny et al 2010</i>         | 11 various isolates           | Spontaneous mutants                               | CAA + apotransferrin | Yes | Figs 4,5  | 0.09                                  | Variable | Cheating observed for 8/11 mutants. Three non-cheats (with high pyoverdine production) may be driving the reported trend.                                                                                                                      |
| <b>Harrison and Buckling 2011</b> | PAO6049                       | Evolved clones                                    | CAA + apotransferrin | Yes | Fig 1     | 0.05, 0.5                             | Variable | Cheating observed at low starting frequencies for a minority of mutants (mean relative fitness = 1)                                                                                                                                            |
| <i>Harrison and Buckling 2011</i> | PAO1 $\Delta mutS$            | Evolved clones                                    | CAA + apotransferrin | Yes | Fig 1     | 0.05, 0.5                             | Variable | Cheating observed at low starting frequencies only for a majority of mutants, but some can cheat from a starting frequency of 0.5.                                                                                                             |
| <b>Dumas and Kümmerli 2012</b>    | ATCC 15692 (PAO1)             | Evolved clones                                    | CAA + apotransferrin | No  | Figs 3, 4 | 0                                     |          | Pyoverdine-deficient clones evolved, but their presence did not consistently reduce population growth - some were associated with increased growth.                                                                                            |
| <b>Dumas et al 2013</b>           | ATCC 15692 (PAO1)             | PAO1 $\Delta pvdD$ and $\Delta pvdD/\Delta pchEF$ | CAA + apotransferrin | No  | Fig 4     | Three-strain mix, each strain at 0.33 |          | Carbon source, pH and temperature determine the relative growth advantage conferred by siderophores in monoculture. In acidic pH, $\Delta pvdD$ grows better. Report outcome of simulated competitions based on monoculture growth parameters. |
| <b>Ghoul et al 2014</b>           | Cystic fibrosis isolate       | 2x spontaneous mutants                            | CAA                  | Yes | Figs 3,4  | 0.1                                   | Yes      | Mutant with reduced pyoverdine production cheats on parent strain, and is cheated on by a second spontaneous mutant with even lower pyoverdine production.                                                                                     |
| <b>Ross-Gillespie et al 2015</b>  | PAO1 $\Delta pvdD$            | PAO1 $\Delta pvdD/\Delta pchEF$                   | CAA + apotransferrin | Yes | Fig 2     | 0.2                                   | Yes      | This experiment competed a double pyoverdine/pyochelin knockouts against a single pyoverdine knockout.                                                                                                                                         |

|                                  |                          |                                 |                      |                                            |              |           |          |                                                                                                                                                                                                                                                                                                                                                                                                                                                                                                                                                                                                                                                                                                                                                                                                                                      |
|----------------------------------|--------------------------|---------------------------------|----------------------|--------------------------------------------|--------------|-----------|----------|--------------------------------------------------------------------------------------------------------------------------------------------------------------------------------------------------------------------------------------------------------------------------------------------------------------------------------------------------------------------------------------------------------------------------------------------------------------------------------------------------------------------------------------------------------------------------------------------------------------------------------------------------------------------------------------------------------------------------------------------------------------------------------------------------------------------------------------|
| <i>Ross-Gillespie et al 2015</i> | PAO1 $\Delta pchEF$      | PAO1 $\Delta pvdD/\Delta pchEF$ | CAA + apotransferrin | Yes                                        | Fig 2        | 0.2       | Yes      | <p>This experiment competed a double pyoverdine/pyochelin knockouts against a single pyochelin knockout.</p> <p>There is a coevolutionary arms race, whereby producers become less exploitable and non-producers become better cheats. Non-producer frequency is negatively correlated with population growth. Non-producers grow less well than producers in monoculture, and contemporary pairs show relative fitness of non-producers is <math>&gt;1</math> (though graphs suggest this effect is small).</p> <p>Cheating inferred by sequence of mutations affecting pyoverdine production and uptake. Very few mutations reported in pyoverdine biosynthetic loci and none pyochelin loci. Most mutations are in <i>pvdS</i>.</p> <p>Mutant cheats only if added to producer cultures before the onset of stationary phase.</p> |
| <b>Kümmerli et al 2015</b>       | ATC 15692 (PAO1)         | PAO1 $\Delta pvdD$              | CAA + apotransferrin | No, but can be inferred from data supplied | Figs 1, 2, 3 | 0.5       | Yes      |                                                                                                                                                                                                                                                                                                                                                                                                                                                                                                                                                                                                                                                                                                                                                                                                                                      |
| <b>Andersen et al 2015</b>       | Cystic fibrosis isolates | CF isolates                     | No culture           | No                                         | Text         |           |          |                                                                                                                                                                                                                                                                                                                                                                                                                                                                                                                                                                                                                                                                                                                                                                                                                                      |
| <b>Ghoul et al 2016</b>          | ATCC 15692 (PAO1)        | PA06609 (PAO9)                  | CAA + apotransferrin | Yes                                        | Figs 1a, 2a  | 0.02-0.10 | Variable |                                                                                                                                                                                                                                                                                                                                                                                                                                                                                                                                                                                                                                                                                                                                                                                                                                      |
